# Supplementary material for: dsRNase1 contribution to dsRNA degradation activity in the Sf9 cells conditioned medium
Source: PubMed Central journal article supplement (PMC10926405; doi:10.3389/finsc.2023.1118775), 2023-01-24
Supplement: DataSheet_1.pdf [file DataSheet_1.pdf]

Supplementary information

dsRNase1 contribution to dsRNA degradation activity in the Sf9 cells conditioned medium

Jinmo Koo<sup>a</sup> and Subba Reddy Palli<sup>a\*</sup>

<sup>a</sup> Department of Entomology, College of Agriculture, University of Kentucky, Lexington, KY 40546, USA

\*Corresponding author: [rpalli@uky.edu](mailto:rpalli@uky.edu)

## Figures

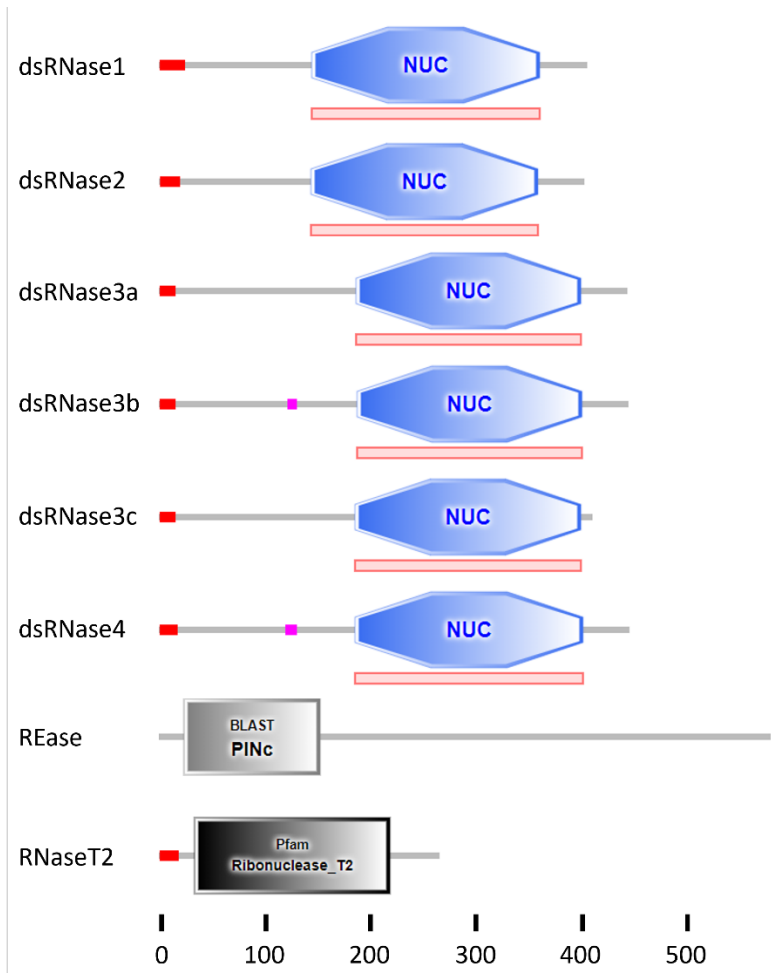

**Figure S1. Characteristic of nucleases.** Conserved domains and signal peptides are indicated for each nuclease. Accession numbers of genes can be found in Table S1. NUC, DNA/RNA non-specific endonuclease domain. PINc, large family of predicted nucleotide-binding domain. Ribonuclease\_T2, Ribonuclease\_T2 domain. Red box, signal peptide. Pink box, low complexity region. Numbers at the bottom indicate amino acid residues.

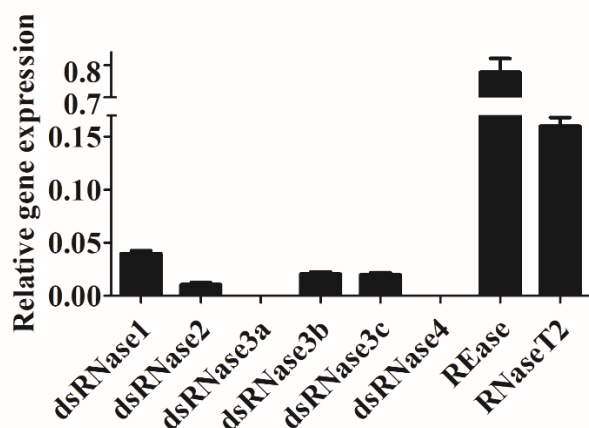

**Figure S2. Expression of nucleases in Sf9 cells.** Total RNA was isolated from Sf9 cells and qRT-PCR was used to determine mRNA levels of nuclease genes. Mean  $\pm$  SE (N = 3) are shown.

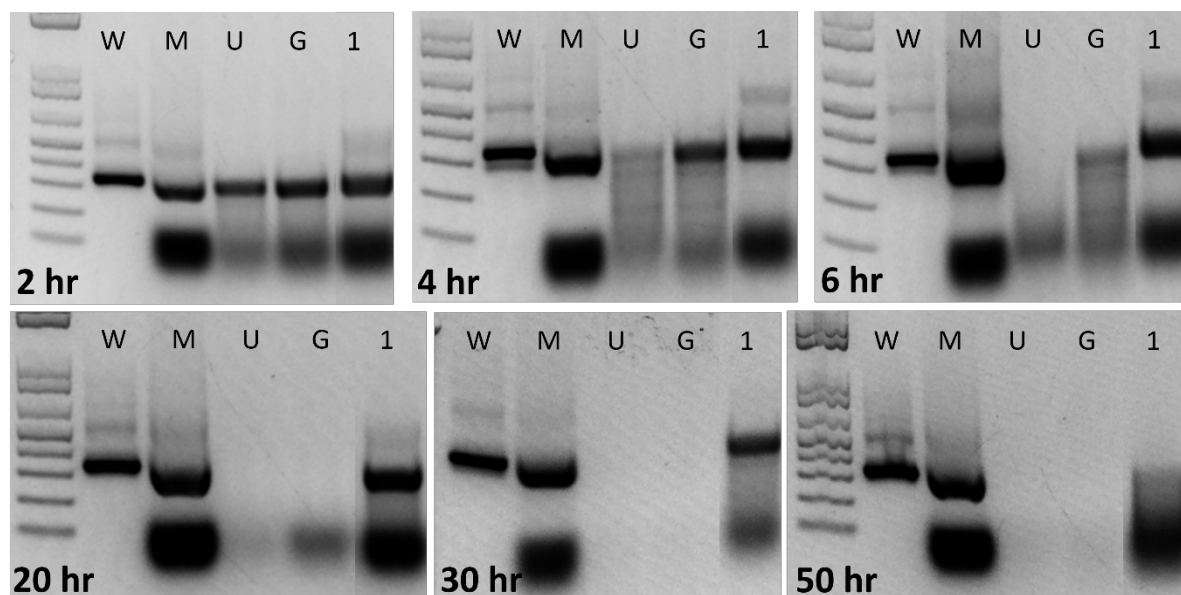

**Figure S3. dsRNA is stable up to 30 hr in conditioned medium from dsRNase1 knockdown cells.** Sf9\_SID1\_Luciferase cells seeded in 48 well plates were treated with 1  $\mu$ g dsRNA. After two days of incubation, the medium was replaced with fresh medium, allowing cells to secrete nucleases into the replaced medium for two additional days. Conditioned medium was collected and incubated with 1  $\mu$ g dsGFP in 28°C for different lengths of time (2, 4, 6, 20, 30, 50 hr). The products were run on 1% agarose gels. dsGFP incubated with water (W), Sf-900 medium (M), conditioned medium from untreated cells (U) or conditioned medium from cells treated with dsRNA targeting GFP (G) and dsRNase1 (1).

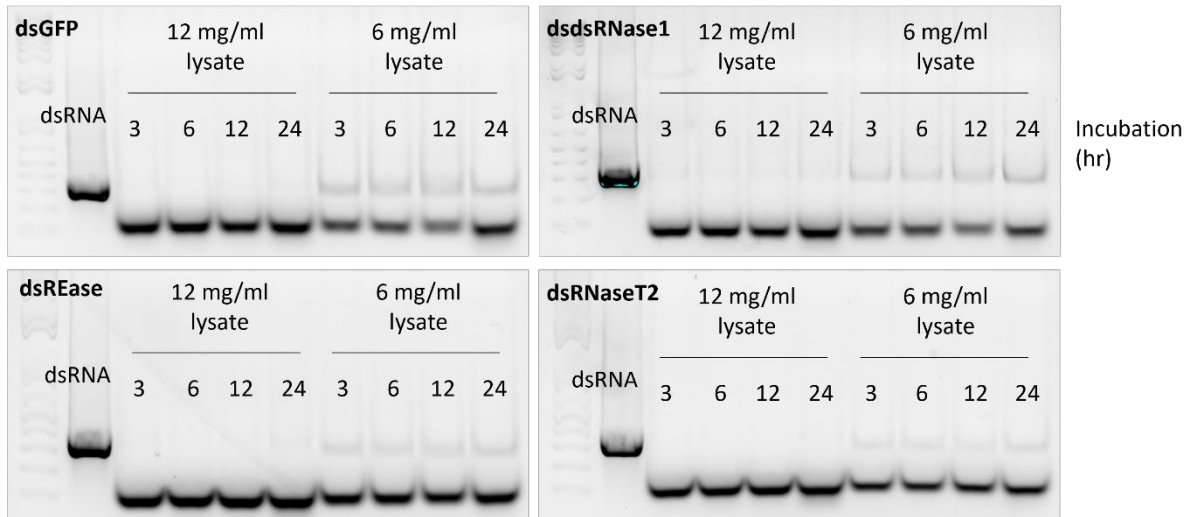

**Figure S4. dsRNA stability in cell lysate.** Sf9\_SID1\_Luciferase cells seeded in 48 well plates were treated with 1  $\mu$ g dsRNA targeting different nucleases (dsRNase1, REase, and RNaseT2). After two days of incubation, cells were harvested and lysates were prepared. One  $\mu$ g dsGFP was mixed with 19  $\mu$ l of cell lysate with different concentrations (6 and 12 mg/ml) and incubated at 28°C for different lengths of time (3, 6, 12, and 24 hr). The products were run on 1% agarose gels.

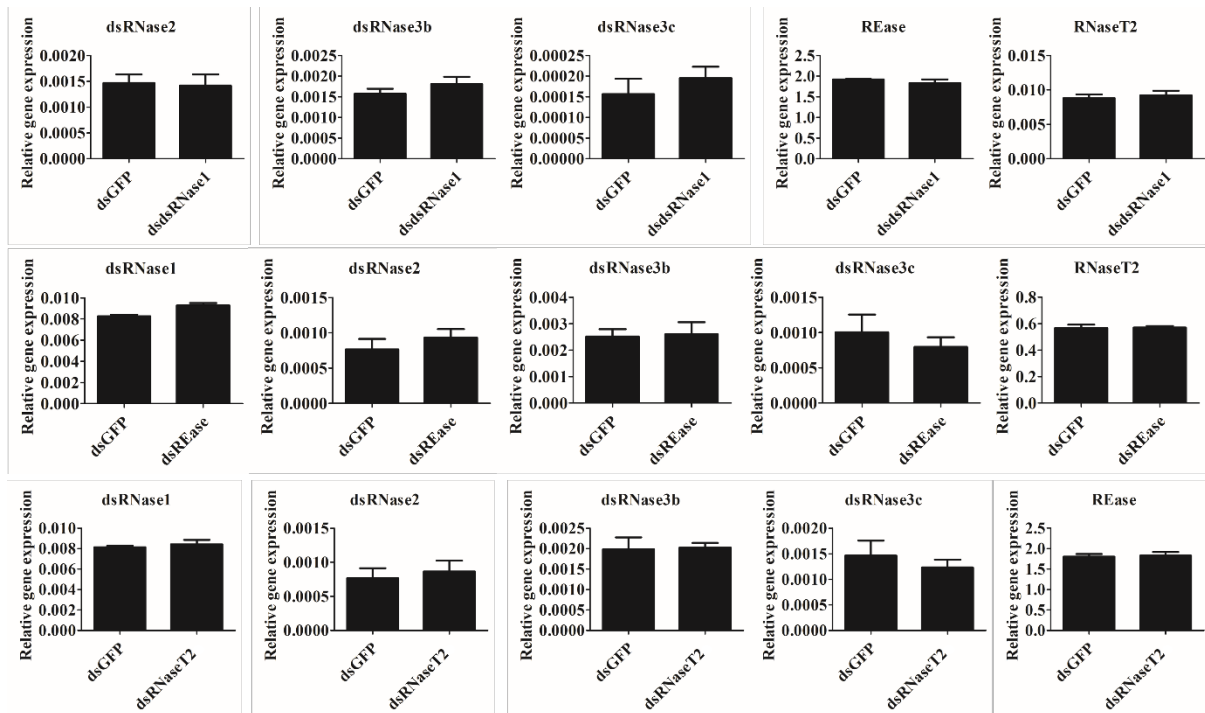

**Figure S5. Specificity of dsRNA targeting dsRNase1, REase, and RNaseT2.** Sf9\_SID1\_Luciferase cells seeded in 48 well plates were treated with 1  $\mu$ g dsRNA targeting different nucleases (dsRNase1, REase, and RNaseT2). After two days of incubation, cells were harvested, and the total RNA was isolated and used in qRT-PCR. Mean  $\pm$  SE (N = 3) are shown. Expression of dsRNase3a and 4 were not included since expression of those genes was not

detected in Sf9\_SID1\_Luciferase cells.

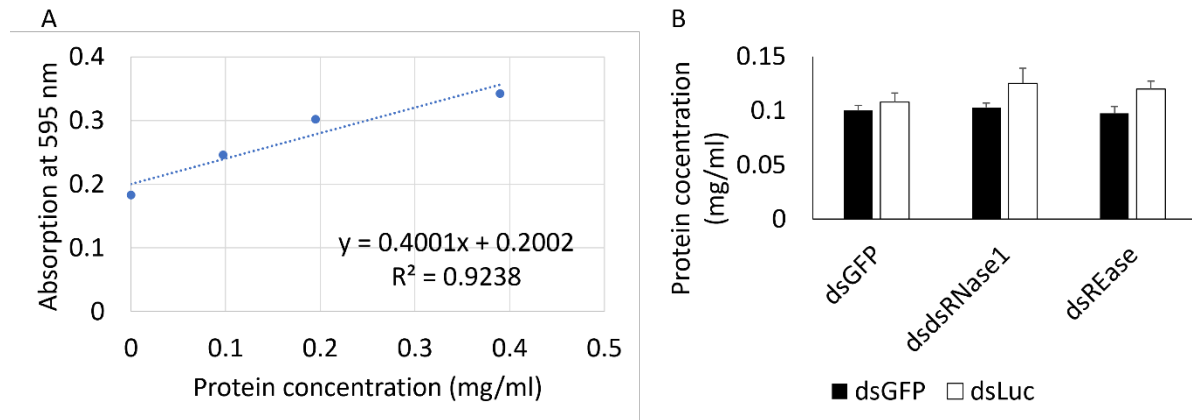

**Figure S6. Bradford assay.** Protein concentration was quantified using Bradford assay for cell lysate used in luciferase assay (Figure 4). A. standard curve was generated using serial dilutions of Bovine serum albumin. B. protein concentrations of each samples calculated using the standard curve.

## Tables

**Table S1. Primer information.** T7 promoter sequence is included in 5' region of all dsRNA primers.

| Primers        | Sequence (5'-3')         | Purpose | T <sub>m</sub> (°C) | Product size (bp) | Accession      |
|----------------|--------------------------|---------|---------------------|-------------------|----------------|
| 28SrRNA qRTF   | CTGCTTACAGAGACGAGGTTAAG  | qPCR    | 63                  | 103               | AY046536.1     |
| 28SrRNA qRTR   | GGGTAGTAGTCCAGACCAGAAT   | qPCR    | 64                  |                   |                |
| dsRNase1 qRTF  | CGTCGTGTCCATGAGTTAGG     | qPCR    | 63                  | 91                | XM_035598562.1 |
| dsRNase1 qRTR  | GATAAAGGAGGTCGGATGAAGG   | qPCR    | 63                  |                   |                |
| dsRNase2 qRTF  | GTGATACCGGTGCCTCTATTT    | qPCR    | 63                  | 108               | XM_035587097.2 |
| dsRNase2 qRTR  | TTATGTGTCTTCAACTGAGGCA   | qPCR    | 63                  |                   |                |
| dsRNase3a qRTF | CACGTGTTTCAGCACACTCTA    | qPCR    | 63                  | 88                | XM_035575402.1 |
| dsRNase3a qRTR | TTATCCGTGTCGGCTTCATC     | qPCR    | 63                  |                   |                |
| dsRNase3b qRTF | GTGGCTGTCAACACCATGTA     | qPCR    | 63                  | 99                | XM_035575401.1 |
| dsRNase3b qRTR | AAATACATCACCACCCACCAG    | qPCR    | 63                  |                   |                |
| dsRNase3c qRTF | GCCAATGCGTCTGTTGAAG      | qPCR    | 63                  | 116               | XM_035575404.1 |
| dsRNase3c qRTR | CTGGCAGCCAAGTATCTGT      | qPCR    | 63                  |                   |                |
| dsRNase4 qRT1F | GGACGTATTCTACCCGCTATAAC  | qPCR    | 63                  | 102               | XM_035575400.2 |
| dsRNase4 qRT1R | CATAACGCTGTCCACCAAAC     | qPCR    | 62                  |                   |                |
| dsRNase4 qRT2F | CACATCCAACCTCAGAGGCT     | qPCR    | 65                  | 137               | XM_035575400.2 |
| dsRNase4 qRT2R | AACTTCGAGGCGACGTTTCAT    | qPCR    | 65                  |                   |                |
| REase qRTF     | CGAGAATGGTTGGGAGGATATAG  | qPCR    | 63                  | 105               | XM_035594883.2 |
| REase qRTR     | ACGCTGTCTCATCTGGTAGTTTAG | qPCR    | 63                  |                   |                |
| RNaseT2 qRTF   | TAGAGCTCCGAGTTTGCTTTG    | qPCR    | 63                  | 127               | XM_035578184.2 |
| RNaseT2 qRTR   | GGAGGTAATGCAGTGGGATAAA   | qPCR    | 63                  |                   |                |
| Luciferase dsF | TATCCGCTGGAAGATGGAAC     | dsRNA   | 62                  | 355               | MK484107.1     |
| Luciferase dsR | ACCCCTTTTTTGAAACGAAC     | dsRNA   | 62                  |                   |                |
| GFP dsF        | CGATGCCACCTACGGCAA       | dsRNA   | 65                  | 248               | MN623123.1     |
| GFP dsR        | TGTCGCCCTCGAACTTCA       | dsRNA   | 64                  |                   |                |
| dsRNase1 dsF   | ACATCCGCTGTAACCTCCCAC    | dsRNA   | 65                  | 553               | XM_035598562.1 |
| dsRNase1 dsR   | GTCATCATTCCATGGTTCCC     | dsRNA   | 62                  |                   |                |
| REase dsF      | CTCCCAACCATTCTCGAATACA   | dsRNA   | 63                  | 473               | XM_035594883.2 |
| REase dsR      | AGCACGAGGAGCAAGAAATA     | dsRNA   | 62                  |                   |                |
| RNaseT2 dsF    | CTCAACAATGGCCTAGCTCC     | dsRNA   | 64                  | 451               | XM_035578184.2 |
| RNaseT2 dsR    | ACACCGATCTTGGAAGCAAC     | dsRNA   | 64                  |                   |                |

**Table S2. qPCR primer efficiency.** CT-values from diluted cDNA (1, 0.1, 0.01) were plotted. Slope from the plot was used to calculate primer efficiency using a tool from ThermoFisher website (<https://www.thermofisher.com/us/en/home/brands/thermo-scientific/molecular-biology/molecular-biology-learning-center/molecular-biology-resource-library/thermo-scientific-web-tools/qpcr-efficiency-calculator.html>). NTC, non target control. Undeter, CT-value not determined due to no amplification. NA, not available. P1, primer1. P2, primer2.

|                       | 28SrRNA       | dsRNase1 | dsRNase2 | dsRNase3a | dsRNase3b | dsRNase3c | dsRNase4 P1 | dsRNase4 P2 | REase   | RNaseT2 |       |
|-----------------------|---------------|----------|----------|-----------|-----------|-----------|-------------|-------------|---------|---------|-------|
| CT-values             | 1 dilution    | 21.29    | 28.37    | 30.74     | 24.32     | 29.75     | 31.31       | Undeter     | Undeter | 20.64   | 22.17 |
|                       | 0.1 dilution  | 24.87    | 31.47    | 34.65     | 28.15     | 33.35     | 34.04       | Undeter     | Undeter | 23.75   | 25.53 |
|                       | 0.01 dilution | 27.89    | 35.07    | 37.42     | 31.28     | 35.87     | 37.35       | Undeter     | Undeter | 27.27   | 28.83 |
|                       | NTC           | Undeter  | Undeter  | Undeter   | Undeter   | Undeter   | Undeter     | Undeter     | Undeter | Undeter | 38.07 |
| Slope                 | -3.30         | -3.35    | -3.34    | -3.48     | -3.06     | -3.02     | NA          | NA          | -3.31   | -3.33   |       |
| primer efficiency (%) | 100.9         | 98.8     | 99.3     | 94.0      | 112.3     | 114.1     | NA          | NA          | 100.3   | 99.6    |       |
